# Supplementary material for: HOPS/TMUB1 Enhances Apoptosis in TP53 Mutation-Independent Setting in Human Cancers
Source: MDPI journal article supplement (doi:10.3390/ijms25094600), 2024-04-23
Supplement: s1 [file s1]

**Figure S1**

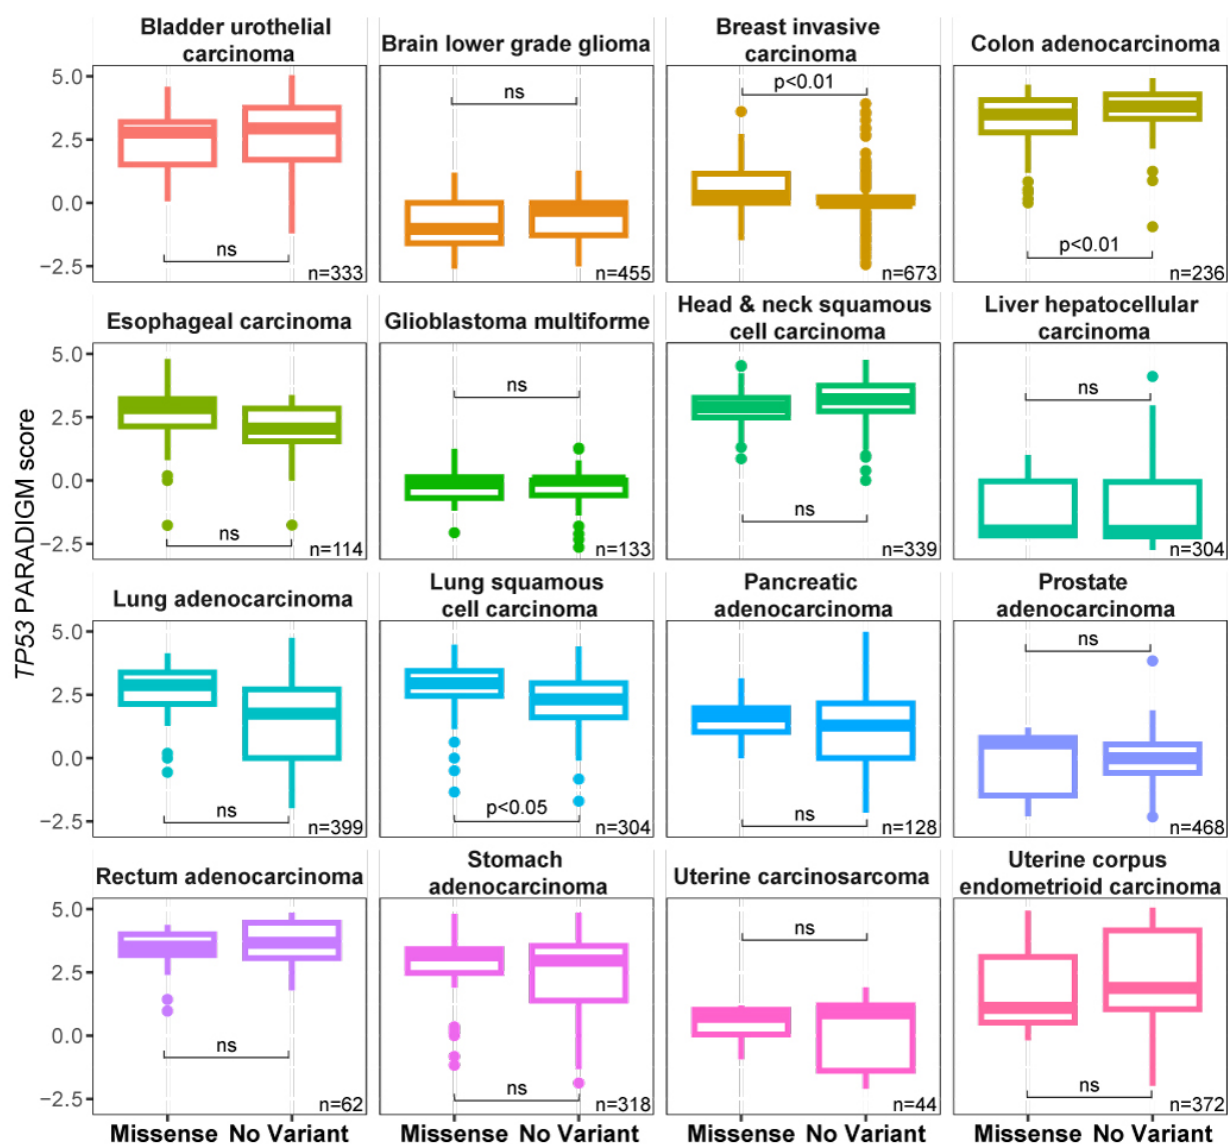

**Figure S1.** TP53 PARADIGM score in selected tumors comparing two subgroups: p53 missense mutations versus no variant.

**Figure S2**

**Breast invasive carcinoma: 1067 patients**

| Genes correlated | Pearson's rho (r) | P-value               |
|------------------|-------------------|-----------------------|
| TMUB1-BAX        | 0,67              | 5,56e <sup>-141</sup> |
| TMUB1-BBC3       | 0,59              | 1,69e <sup>-100</sup> |
| TMUB1-NOXA1      | 0,57              | 5,28e <sup>-91</sup>  |

Heatmap correlation index

|     | BAX             | BBC3            | NOXA1           |
|-----|-----------------|-----------------|-----------------|
| 2-1 | ***<br>p <0.001 | ***<br>p <0.001 | ***<br>p <0.001 |
| 3-1 | ***<br>p <0.001 | ***<br>p <0.001 | ***<br>p <0.001 |
| 4-1 | ***<br>p <0.001 | ***<br>p <0.001 | ***<br>p <0.001 |
| 3-2 | ***<br>p <0.001 | ***<br>p <0.001 | ***<br>p <0.001 |
| 4-2 | ***<br>p <0.001 | ***<br>p <0.001 | ***<br>p <0.001 |
| 4-3 | ***<br>p <0.001 | ***<br>p <0.001 | ***<br>p <0.001 |

Quartiles comparison

**Lung adenocarcinoma: 475 patients**

| Genes correlated | Pearson's rho (r) | P-value              |
|------------------|-------------------|----------------------|
| TMUB1-BAX        | 0,41              | 5,23e <sup>-21</sup> |
| TMUB1-BBC3       | 0,46              | 4,98e <sup>-26</sup> |
| TMUB1-NOXA1      | 0,43              | 9,88e <sup>-23</sup> |

Heatmap correlation index

|     | BAX             | BBC3            | NOXA1           |
|-----|-----------------|-----------------|-----------------|
| 2-1 | ***<br>p <0.001 | ***<br>p <0.001 | **<br>p =0,008  |
| 3-1 | ***<br>p <0.001 | ***<br>p <0.001 | ***<br>p <0.001 |
| 4-1 | ***<br>p <0.001 | ***<br>p <0.001 | ***<br>p <0.001 |
| 3-2 | ns<br>p =0,945  | ns<br>p =0,473  | ns<br>p =0,101  |
| 4-2 | *<br>p =0,032   | *<br>p =0,014   | ***<br>p <0.001 |
| 4-3 | ns<br>p =0,130  | ns<br>p =0,394  | ns<br>p =0,187  |

Quartiles comparison

**Pancreatic adenocarcinoma: 164 patients**

| Genes correlated | Pearson's rho (r) | P-value              |
|------------------|-------------------|----------------------|
| TMUB1-BAX        | 0,51              | 2,49e <sup>-12</sup> |
| TMUB1-BBC3       | 0,72              | 2,47e <sup>-22</sup> |
| TMUB1-NOXA1      | 0,75              | 8,25e <sup>-32</sup> |

Heatmap correlation index

|     | BAX             | BBC3            | NOXA1           |
|-----|-----------------|-----------------|-----------------|
| 2-1 | ns<br>p =0,104  | ***<br>p <0.001 | ***<br>p <0.001 |
| 3-1 | ***<br>p <0.001 | ***<br>p <0.001 | ***<br>p <0.001 |
| 4-1 | ***<br>p <0.001 | ***<br>p <0.001 | ***<br>p <0.001 |
| 3-2 | ns<br>p =0,422  | ns<br>p =0,316  | ns<br>p =0,999  |
| 4-2 | ***<br>p <0.001 | ***<br>p <0.001 | *<br>p =0,034   |
| 4-3 | *<br>p =0,019   | *<br>p =0,014   | *<br>p =0,037   |

Quartiles comparison

**Figure S2.** Correlation values related to heatmap showed in Figure 6 into selected tumors data. The tables on the left display the p-value of comparison in HOPS/TMUB1 quartiles among the apoptotic genes BAX, BBC3 and NOXA1.

**Table 1.** Primer sequences used in the RT-qPCR assays.

| Target         | Primer name | Sequence (5'→3')        |
|----------------|-------------|-------------------------|
| <i>β-actin</i> | β-actin H F | CACTCTTCCAGCCTTCCT      |
|                | β-actin H R | CAGGTCTTTGCGGATGTC      |
| <i>Myc</i>     | Myc H F     | CACACATCAGCACAACTACG    |
|                | Myc H R     | CTGTCCAACCTTGACCCTCTT   |
| <i>Tp63</i>    | TP63 H F    | CGTGTCCTTCCAGCAGTC      |
|                | TP63 H R    | GGCAGTAGAGTTTCTTCAGTTCA |

**Figure S3**

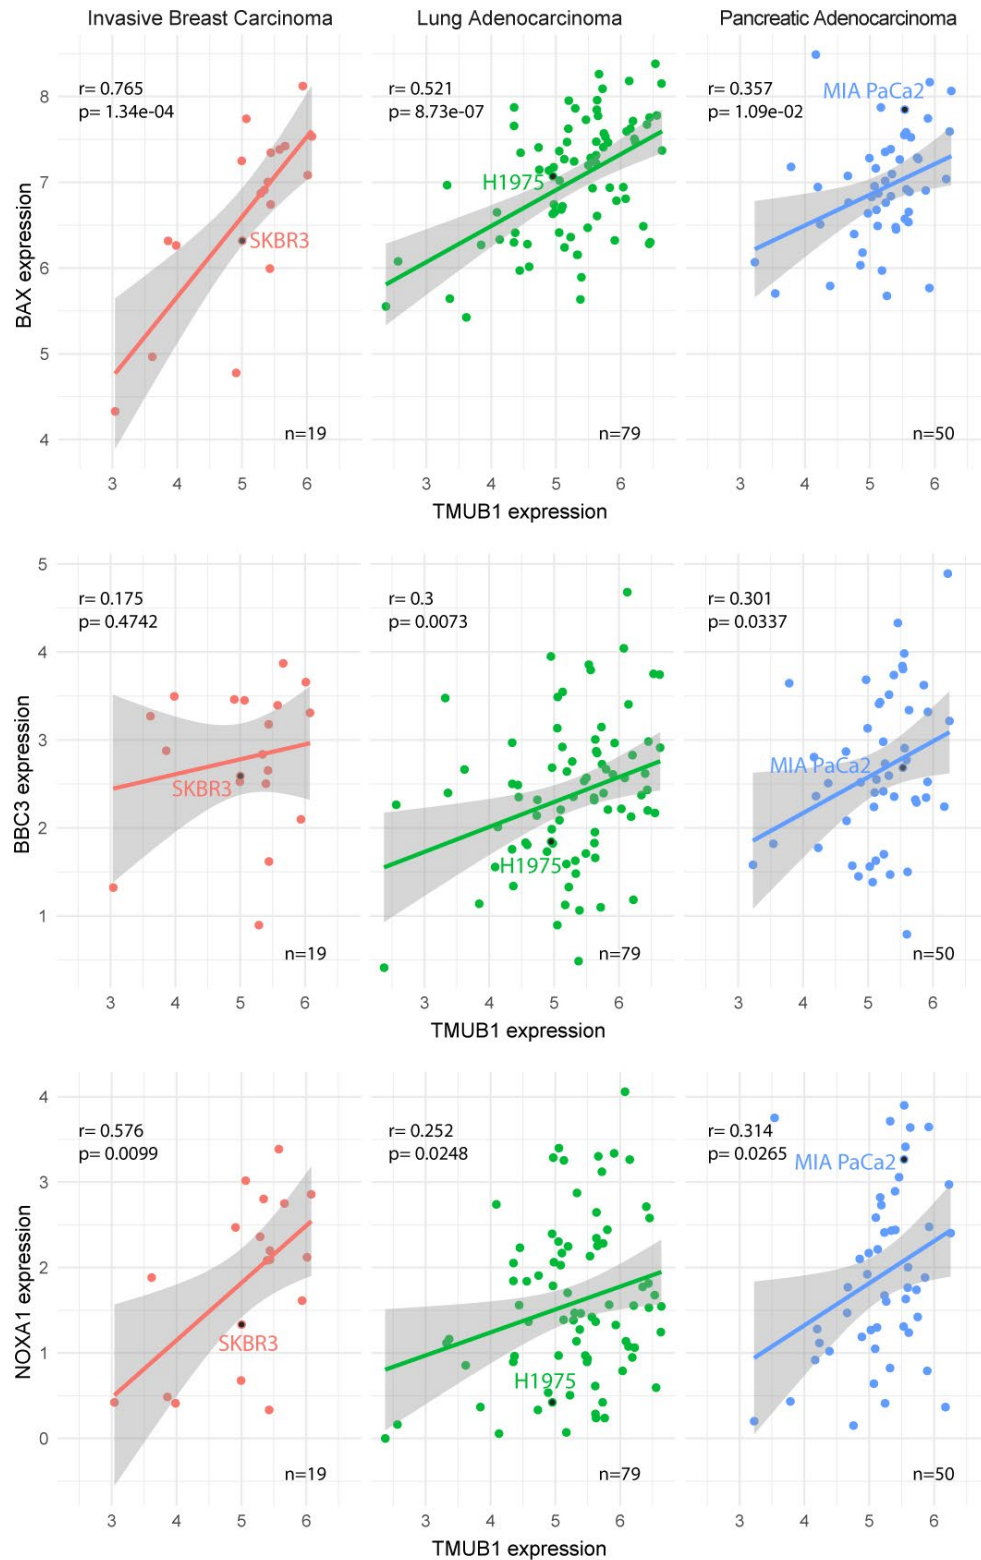

**Figure S3.** Correlation analysis in selected cell lines type (Invasive Breast Carcinoma, n=19; Lung Adenocarcinoma, n=79; Pancreatic Adenocarcinoma, n=50) between *TMUB1* expression and the apoptotic genes analysed (*BAX*, *BBC3* and *NOXA1*). Correlation score is reported in each scatter plot. Regression line is shown to estimate the linear relationship between the genes.

## **FACS analysis raw data**

Samples identification:

SAMPLE 1) Control

SAMPLE 2) Dead cells (FVD)

SAMPLE 3) FVD control

SAMPLE 4) Cy7 control

SAMPLE 5) GFP control

SAMPLE 6) GFP + FVD control

SAMPLE 7) GFP + Cy7 control

SAMPLE 8) pEGFP-N1 (+GFP)

SAMPLE 9) pEGFP-N1-HOPS (+HOPS-GFP)

# SKBR3

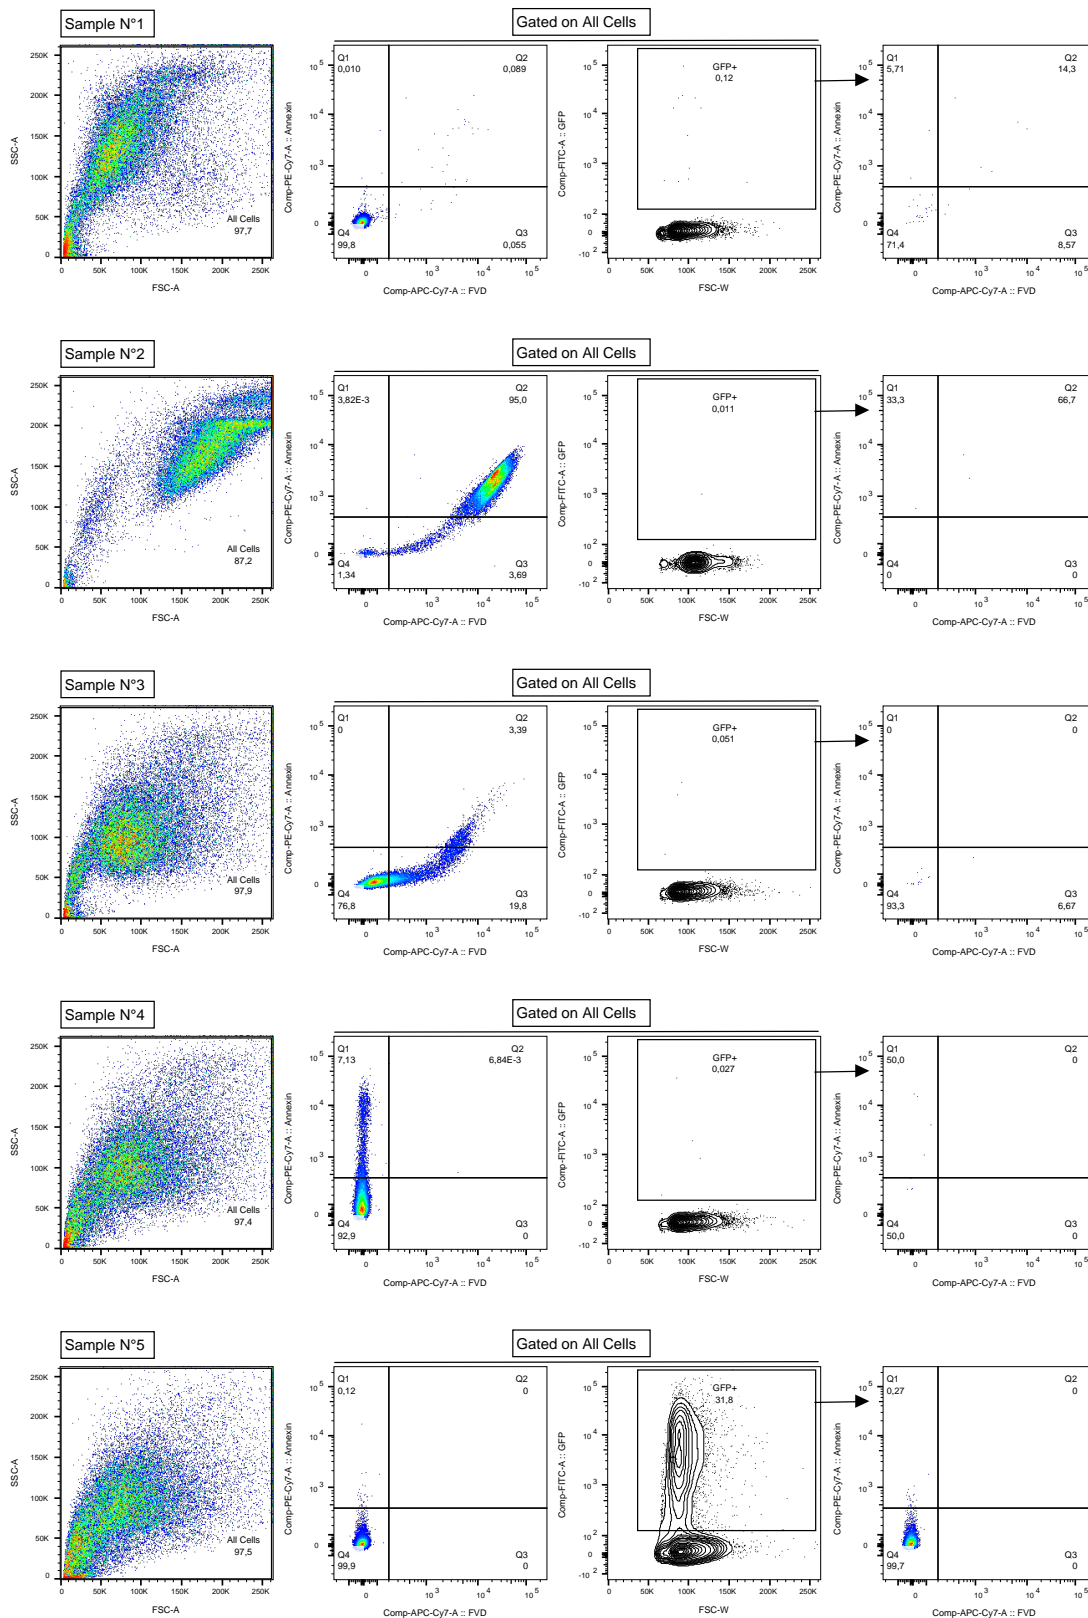

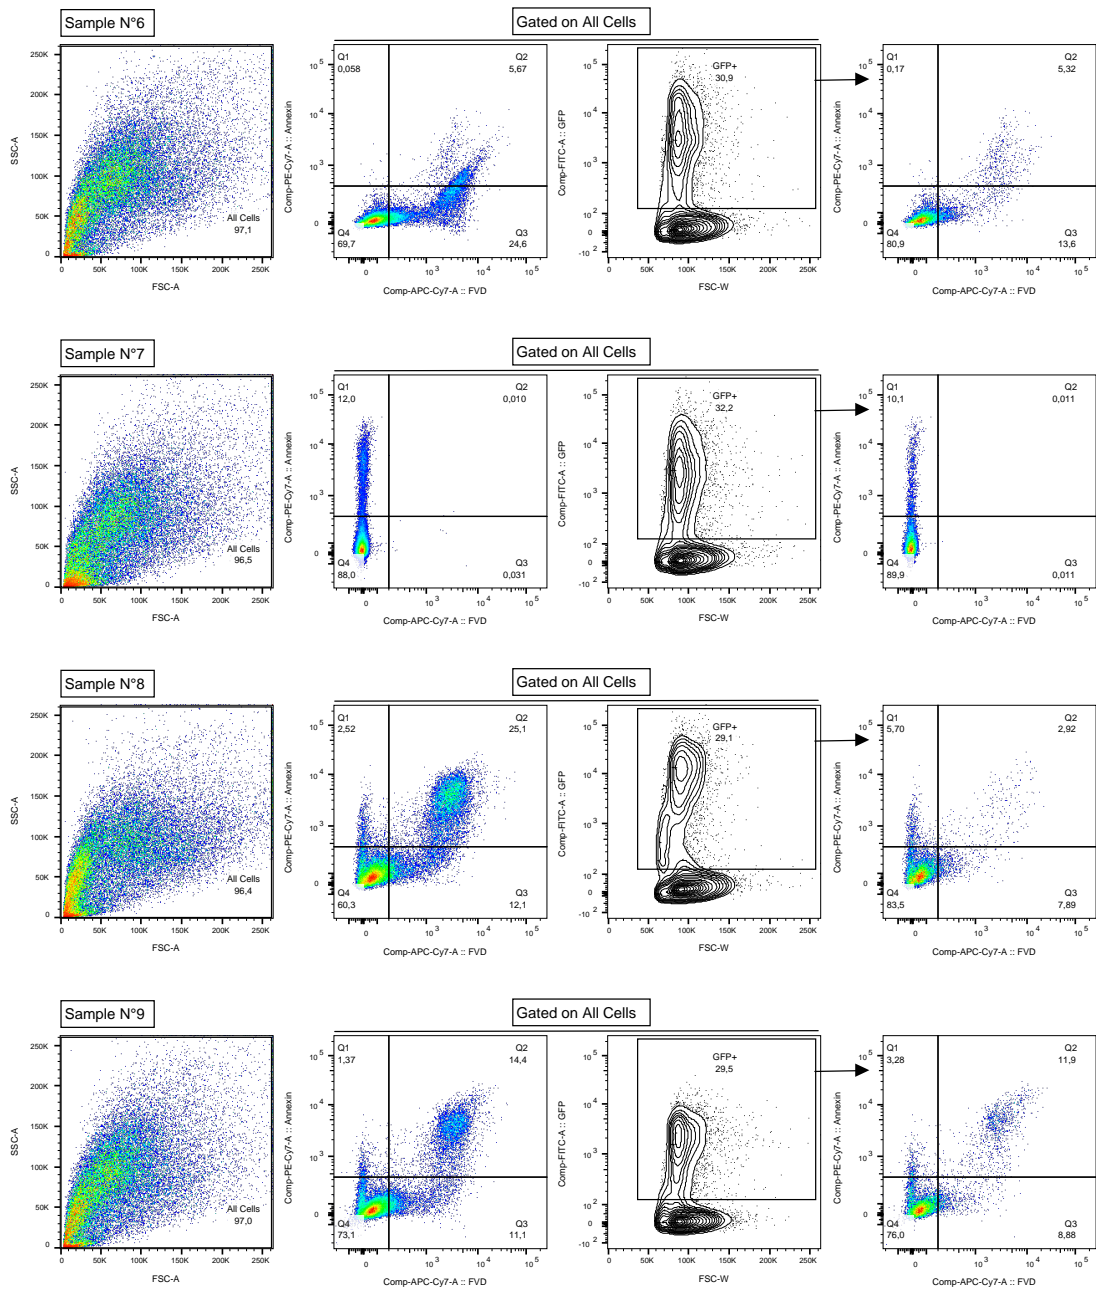

MIA PaCa 2

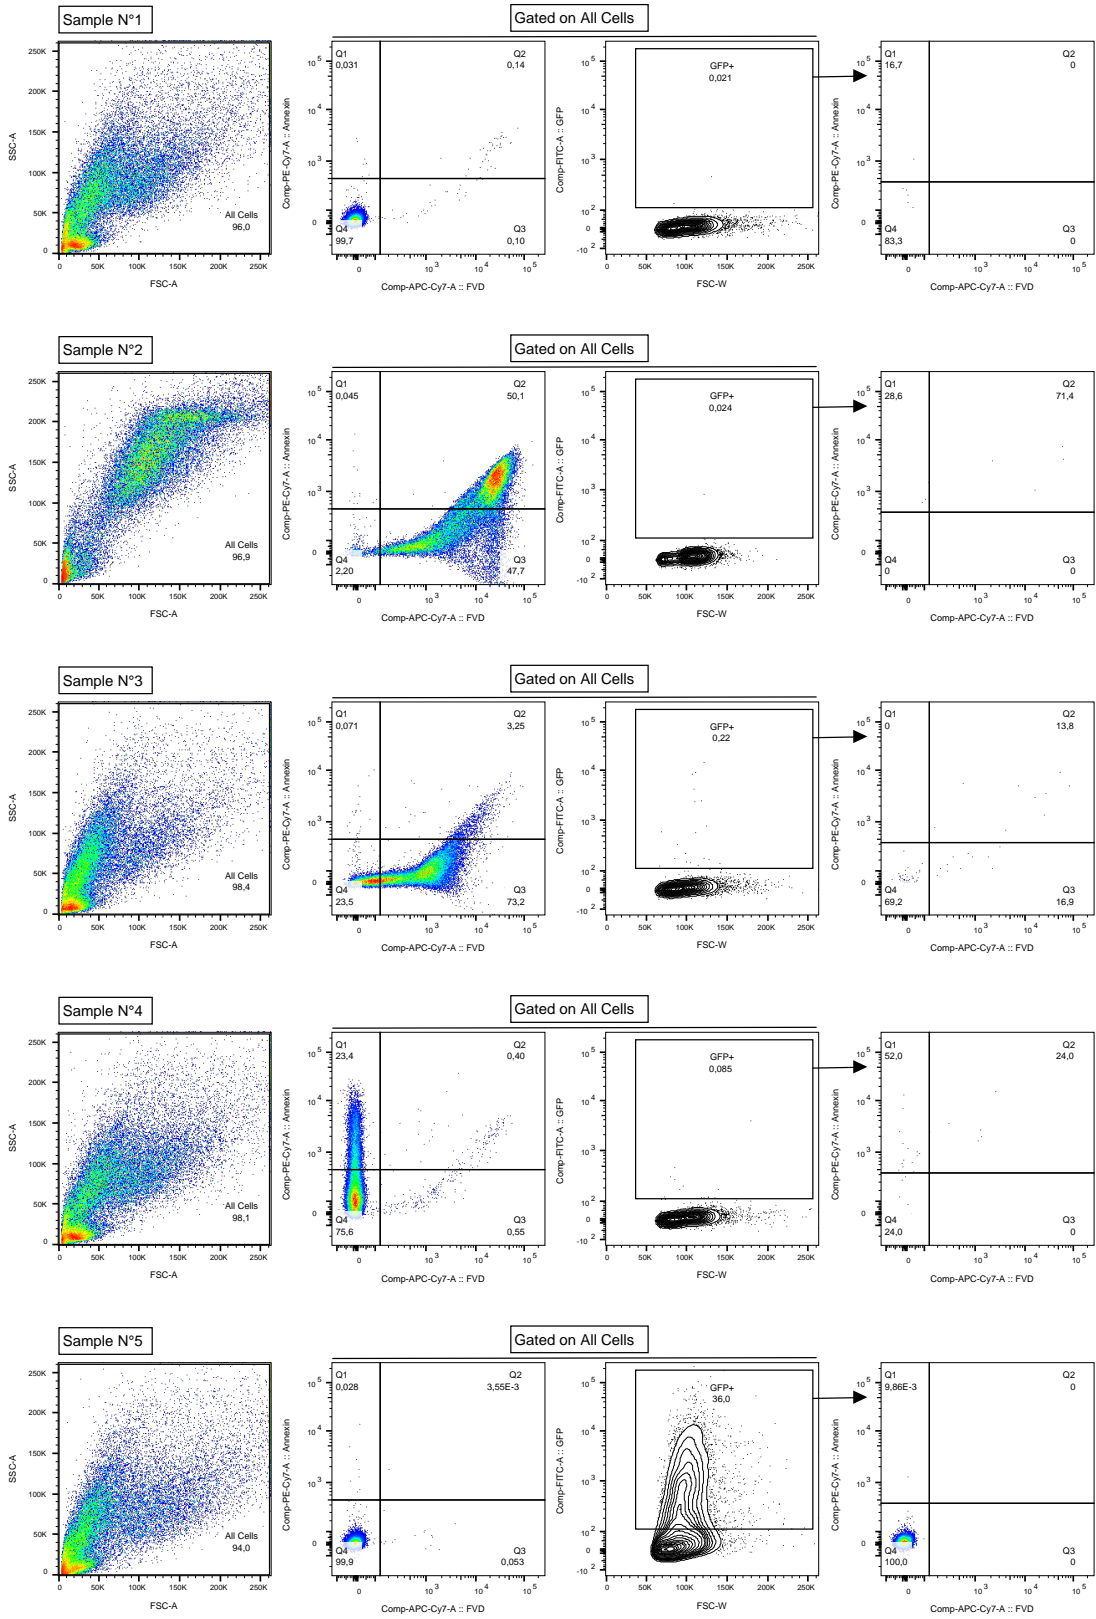



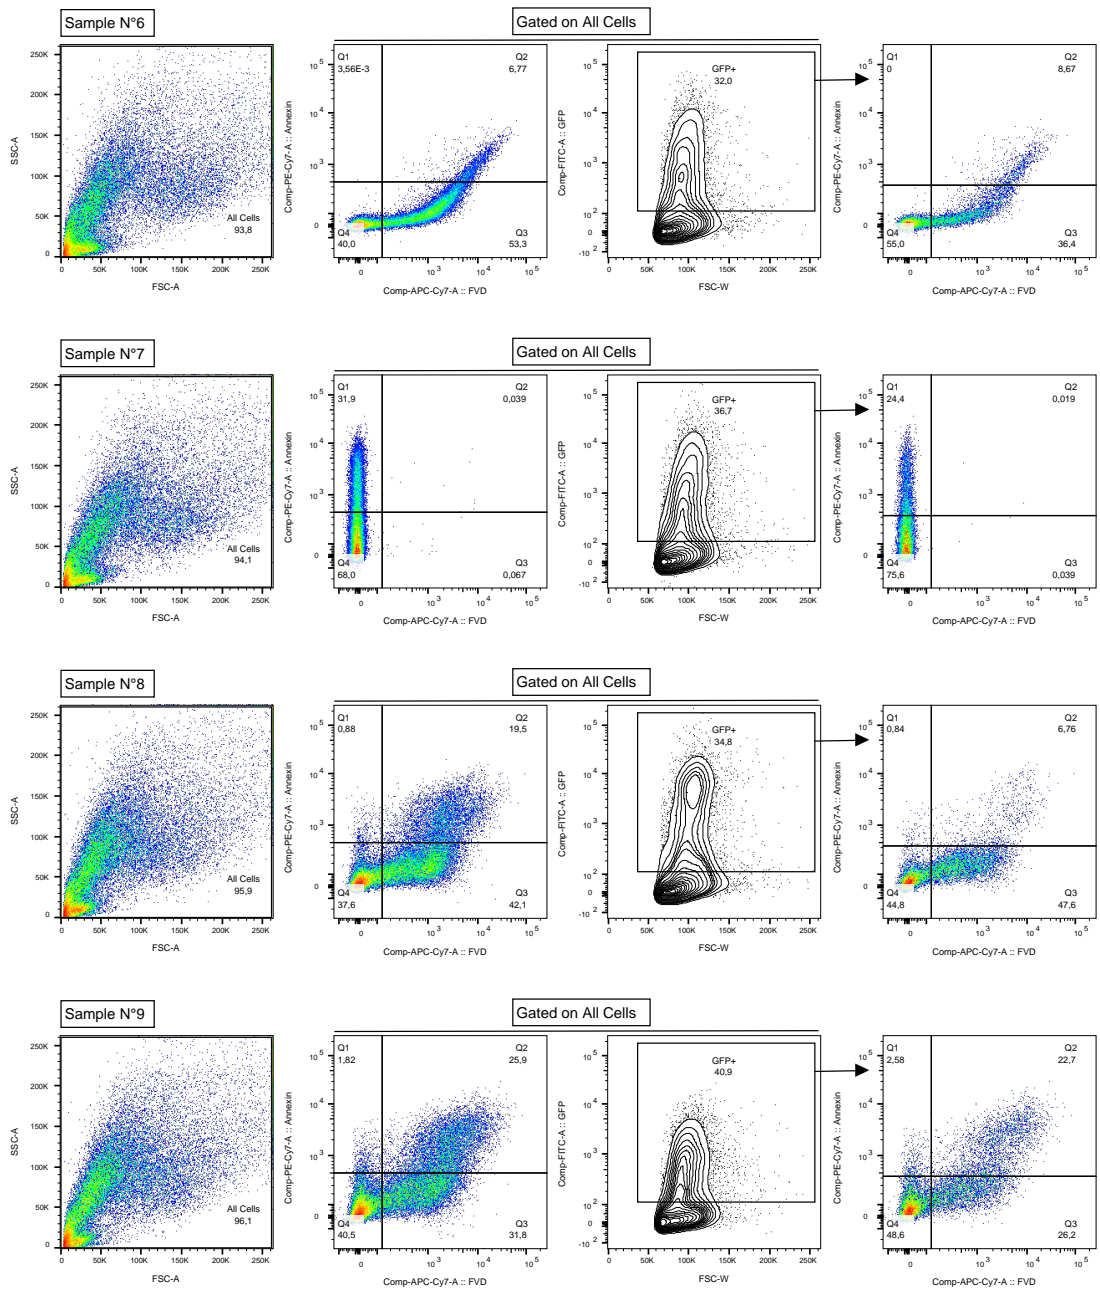

# H1975

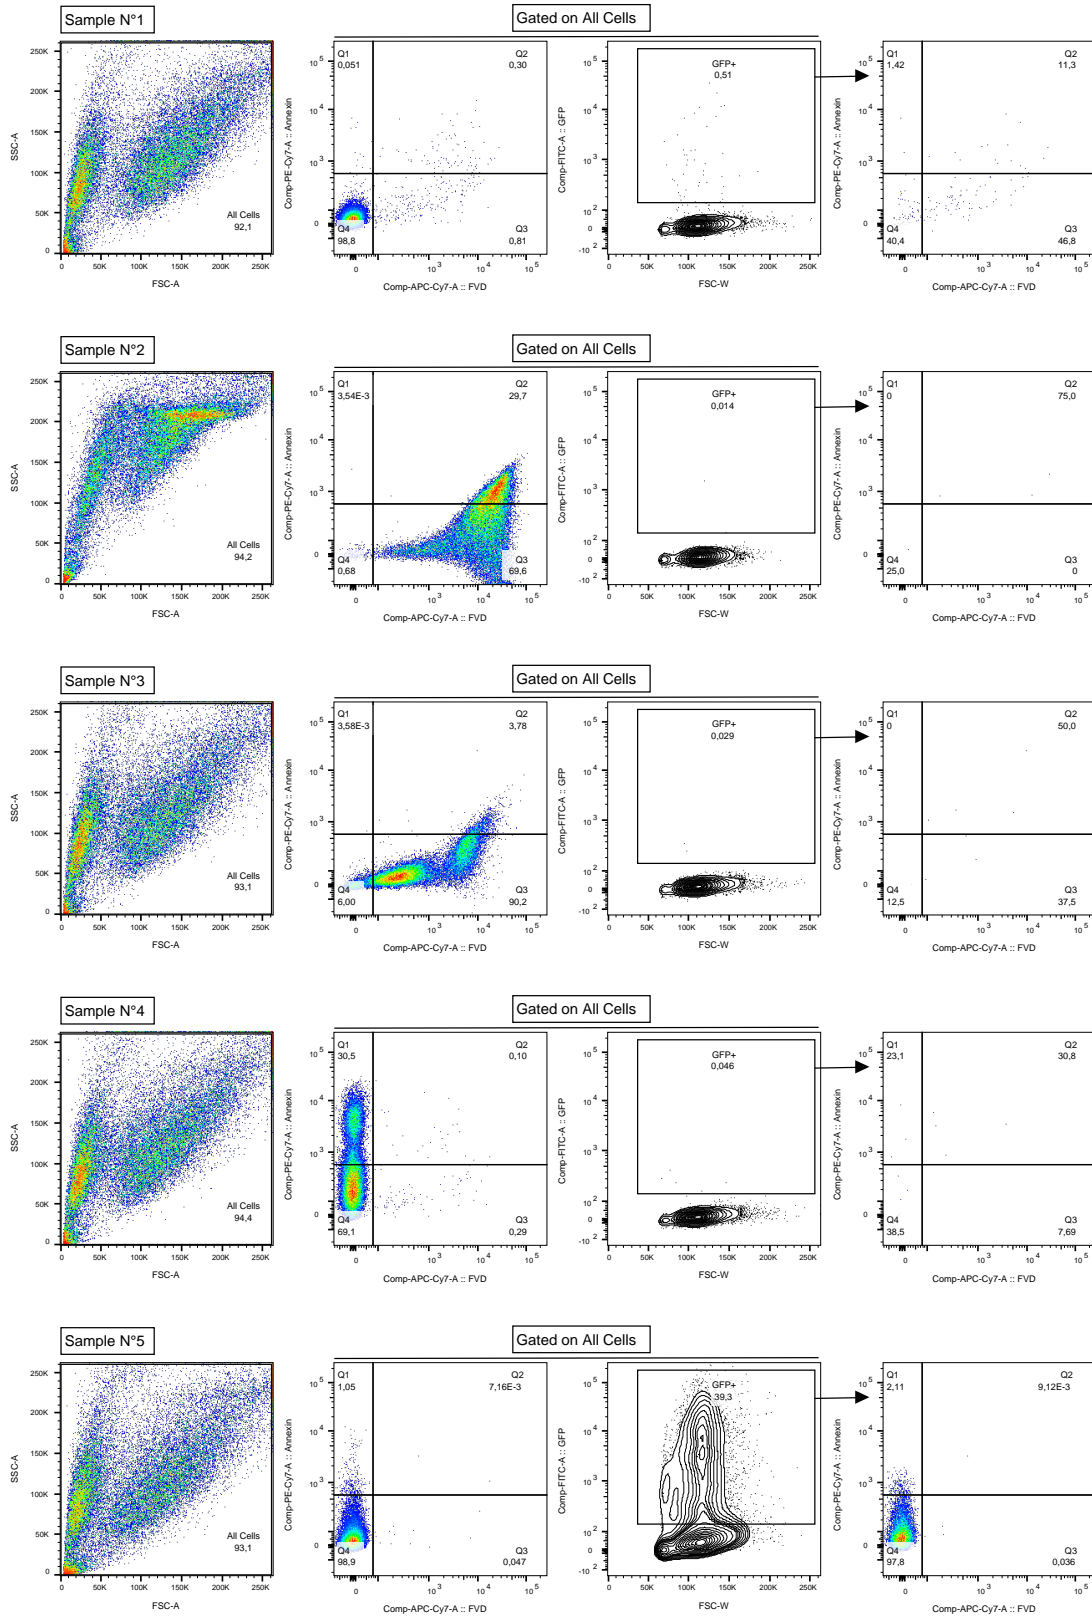

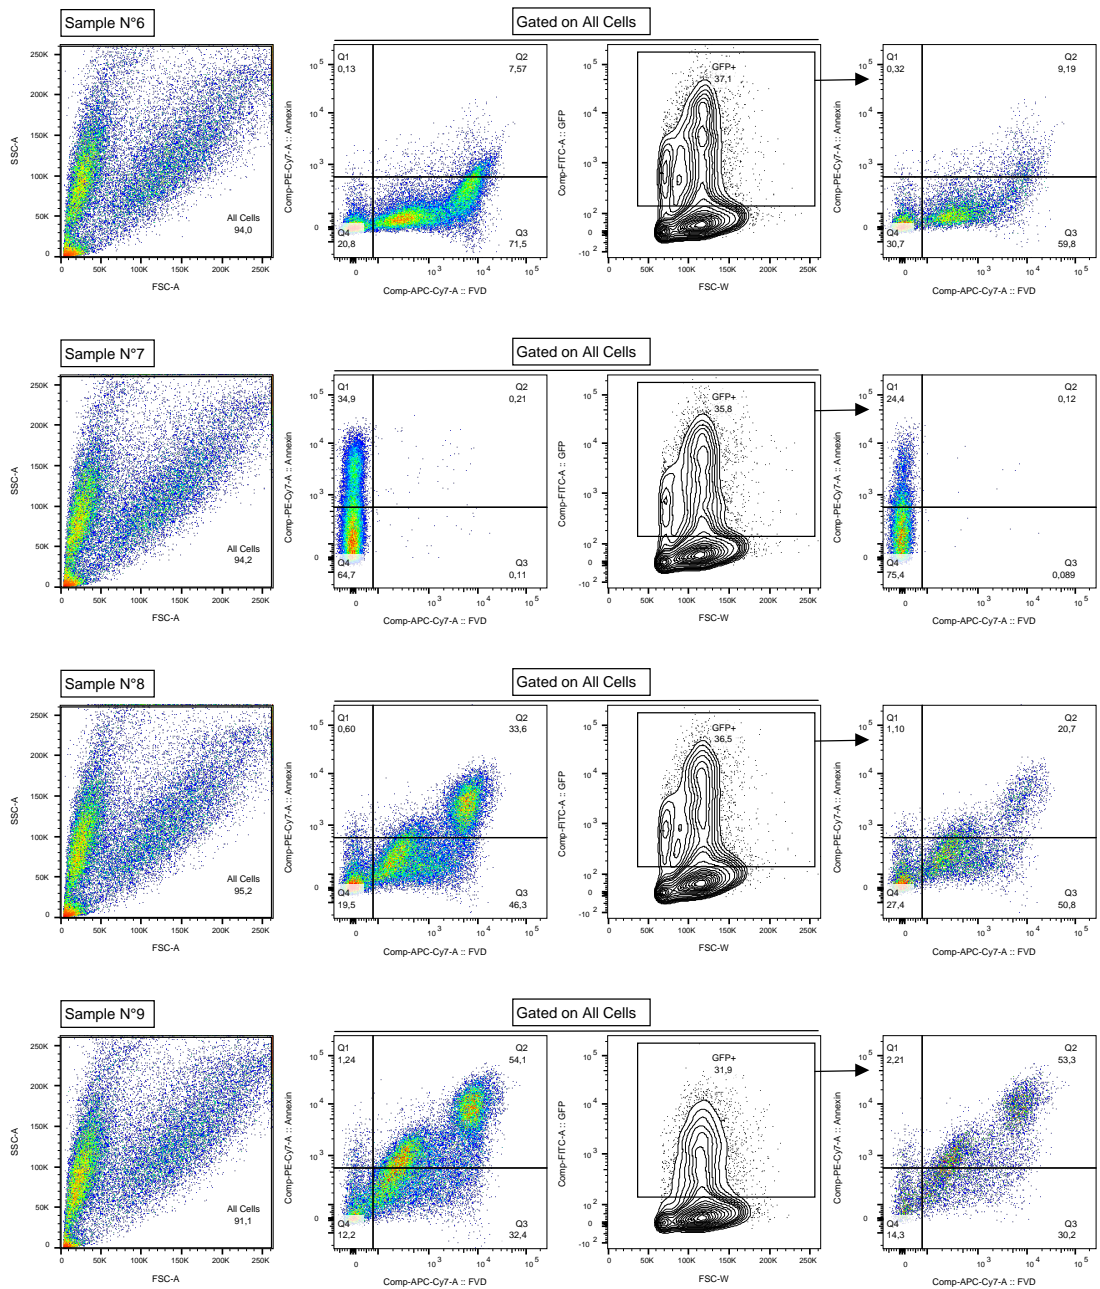

**Table S2.** Tumors selection workflow

|                                                | Mutations count in <i>TP53</i> DBD |      |      |      |      | Selected tumors Mutation counts per tumor type |     |
|------------------------------------------------|------------------------------------|------|------|------|------|------------------------------------------------|-----|
|                                                | R175                               | R213 | R248 | R273 | R282 |                                                |     |
| <b>Adrenocortical cancer</b>                   | 0                                  | 0    | 0    | 1    | 0    |                                                | 1   |
| <b>Bladder urothelial carcinoma</b>            | 3                                  | 1    | 20   | 7    | 2    | X                                              | 33  |
| <b>Brain lower grade glioma</b>                | 8                                  | 1    | 11   | 66   | 6    | X                                              | 92  |
| <b>Breast invasive carcinoma</b>               | 15                                 | 0    | 7    | 17   | 3    | X                                              | 42  |
| <b>Cholangiocarcinoma</b>                      | 0                                  | 0    | 1    | 0    | 0    |                                                | 1   |
| <b>Colon adenocarcinoma</b>                    | 17                                 | 2    | 19   | 16   | 10   | X                                              | 64  |
| <b>Diffuse large B-cell lymphoma</b>           | 0                                  | 0    | 1    | 1    | 0    |                                                | 2   |
| <b>Esophageal carcinoma</b>                    | 9                                  | 0    | 13   | 10   | 6    | X                                              | 38  |
| <b>Glioblastoma multiforme</b>                 | 3                                  | 0    | 4    | 4    | 1    | X                                              | 12  |
| <b>Head &amp; neck squamous cell carcinoma</b> | 6                                  | 1    | 16   | 14   | 10   | X                                              | 47  |
| <b>Kidney chromophobe</b>                      | 0                                  | 0    | 0    | 0    | 1    |                                                | 1   |
| <b>Kidney clear cell carcinoma</b>             | 0                                  | 1    | 1    | 0    | 0    |                                                | 2   |
| <b>Liver hepatocellular carcinoma</b>          | 1                                  | 2    | 3    | 2    | 0    | X                                              | 8   |
| <b>Lung adenocarcinoma</b>                     | 1                                  | 0    | 5    | 9    | 2    | X                                              | 17  |
| <b>Lung squamous cell carcinoma</b>            | 8                                  | 2    | 10   | 15   | 5    | X                                              | 40  |
| <b>Mesothelioma</b>                            | 0                                  | 0    | 0    | 2    | 0    |                                                | 2   |
| <b>Pancreatic adenocarcinoma</b>               | 4                                  | 0    | 8    | 5    | 3    | X                                              | 20  |
| <b>Prostate adenocarcinoma</b>                 | 2                                  | 0    | 5    | 1    | 2    | X                                              | 10  |
| <b>Rectum adenocarcinoma</b>                   | 7                                  | 1    | 7    | 7    | 8    | X                                              | 30  |
| <b>Sarcoma</b>                                 | 5                                  | 1    | 4    | 1    | 0    |                                                | 11  |
| <b>Stomach adenocarcinoma</b>                  | 12                                 | 0    | 7    | 17   | 6    | X                                              | 42  |
| <b>Thymoma</b>                                 | 0                                  | 0    | 1    | 1    | 0    |                                                | 2   |
| <b>Uterine carcinosarcoma</b>                  | 2                                  | 0    | 7    | 4    | 0    | X                                              | 13  |
| <b>Uterine corpus endometrioid carcinoma</b>   | 9                                  | 0    | 10   | 14   | 6    | X                                              | 39  |
| <b>Total counts</b>                            | 112                                | 12   | 160  | 214  | 71   |                                                | 569 |

**Table S1.** Primer sequences used in the RT-qPCR assays.

| Target         | Primer name | Sequence (5'→3')        |
|----------------|-------------|-------------------------|
| <i>β-actin</i> | β-actin H F | CACTCTTCCAGCCTTCCT      |
|                | β-actin H R | CAGGTCTTTGCGGATGTC      |
| <i>Myc</i>     | Myc H F     | CACACATCAGCACAACTACG    |
|                | Myc H R     | CTGTCCAACCTTGACCCTCTT   |
| <i>Tp63</i>    | TP63 H F    | CGTGTCCTTCCAGCAGTC      |
|                | TP63 H R    | GGCAGTAGAGTTTCTTCAGTTCA |
