# Supplementary material for: HOPS/TMUB1 Enhances Apoptosis in TP53 Mutation-Independent Setting in Human Cancers
Source: MDPI journal article supplement (doi:10.3390/ijms25094600), 2024-04-23
Supplement: s1 [file s1]

**Figure S2**

**Breast invasive carcinoma: 1067 patients**

| Genes correlated | Pearson's rho (r) | P-value               |
|------------------|-------------------|-----------------------|
| TMUB1-BAX        | 0,67              | 5,56e <sup>-141</sup> |
| TMUB1-BBC3       | 0,59              | 1,69e <sup>-100</sup> |
| TMUB1-NOXA1      | 0,57              | 5,28e <sup>-91</sup>  |

Heatmap correlation index

|     | BAX             | BBC3            | NOXA1           |
|-----|-----------------|-----------------|-----------------|
| 2-1 | ***<br>p <0.001 | ***<br>p <0.001 | ***<br>p <0.001 |
| 3-1 | ***<br>p <0.001 | ***<br>p <0.001 | ***<br>p <0.001 |
| 4-1 | ***<br>p <0.001 | ***<br>p <0.001 | ***<br>p <0.001 |
| 3-2 | ***<br>p <0.001 | ***<br>p <0.001 | ***<br>p <0.001 |
| 4-2 | ***<br>p <0.001 | ***<br>p <0.001 | ***<br>p <0.001 |
| 4-3 | ***<br>p <0.001 | ***<br>p <0.001 | ***<br>p <0.001 |

Quartiles comparison

**Lung adenocarcinoma: 475 patients**

| Genes correlated | Pearson's rho (r) | P-value              |
|------------------|-------------------|----------------------|
| TMUB1-BAX        | 0,41              | 5,23e <sup>-21</sup> |
| TMUB1-BBC3       | 0,46              | 4,98e <sup>-26</sup> |
| TMUB1-NOXA1      | 0,43              | 9,88e <sup>-23</sup> |

Heatmap correlation index

|     | BAX             | BBC3            | NOXA1           |
|-----|-----------------|-----------------|-----------------|
| 2-1 | ***<br>p <0.001 | ***<br>p <0.001 | **<br>p =0,008  |
| 3-1 | ***<br>p <0.001 | ***<br>p <0.001 | ***<br>p <0.001 |
| 4-1 | ***<br>p <0.001 | ***<br>p <0.001 | ***<br>p <0.001 |
| 3-2 | ns<br>p =0,945  | ns<br>p =0,473  | ns<br>p =0,101  |
| 4-2 | *<br>p =0,032   | *<br>p =0,014   | ***<br>p <0.001 |
| 4-3 | ns<br>p =0,130  | ns<br>p =0,394  | ns<br>p =0,187  |

Quartiles comparison

**Pancreatic adenocarcinoma: 164 patients**

| Genes correlated | Pearson's rho (r) | P-value              |
|------------------|-------------------|----------------------|
| TMUB1-BAX        | 0,51              | 2,49e <sup>-12</sup> |
| TMUB1-BBC3       | 0,72              | 2,47e <sup>-22</sup> |
| TMUB1-NOXA1      | 0,75              | 8,25e <sup>-32</sup> |

Heatmap correlation index

|     | BAX             | BBC3            | NOXA1           |
|-----|-----------------|-----------------|-----------------|
| 2-1 | ns<br>p =0,104  | ***<br>p <0.001 | ***<br>p <0.001 |
| 3-1 | ***<br>p <0.001 | ***<br>p <0.001 | ***<br>p <0.001 |
| 4-1 | ***<br>p <0.001 | ***<br>p <0.001 | ***<br>p <0.001 |
| 3-2 | ns<br>p =0,422  | ns<br>p =0,316  | ns<br>p =0,999  |
| 4-2 | ***<br>p <0.001 | ***<br>p <0.001 | *<br>p =0,034   |
| 4-3 | *<br>p =0,019   | *<br>p =0,014   | *<br>p =0,037   |

Quartiles comparison

**Figure S2.** Correlation values related to heatmap showed in Figure 6 into selected tumors data. The tables on the left display the p-value of comparison in HOPS/TMUB1 quartiles among the apoptotic genes BAX, BBC3 and NOXA1.

**Table 1.** Primer sequences used in the RT-qPCR assays.

| Target         | Primer name | Sequence (5'→3')        |
|----------------|-------------|-------------------------|
| <i>β-actin</i> | β-actin H F | CACTCTTCCAGCCTTCCT      |
|                | β-actin H R | CAGGTCTTTGCGGATGTC      |
| <i>Myc</i>     | Myc H F     | CACACATCAGCACAACTACG    |
|                | Myc H R     | CTGTCCAACCTTGACCCTCTT   |
| <i>Tp63</i>    | TP63 H F    | CGTGTCCTTCCAGCAGTC      |
|                | TP63 H R    | GGCAGTAGAGTTTCTTCAGTTCA |
