# Supplementary material for: HOPS/TMUB1 Enhances Apoptosis in TP53 Mutation-Independent Setting in Human Cancers
Source: MDPI journal article supplement (doi:10.3390/ijms25094600), 2024-04-23
Supplement: s1 [file s1]

**Table S2.** Tumors selection workflow

|                                                | Mutations count in <i>TP53</i> DBD |      |      |      |      | Selected tumors Mutation counts per tumor type |     |
|------------------------------------------------|------------------------------------|------|------|------|------|------------------------------------------------|-----|
|                                                | R175                               | R213 | R248 | R273 | R282 |                                                |     |
| <b>Adrenocortical cancer</b>                   | 0                                  | 0    | 0    | 1    | 0    |                                                | 1   |
| <b>Bladder urothelial carcinoma</b>            | 3                                  | 1    | 20   | 7    | 2    | X                                              | 33  |
| <b>Brain lower grade glioma</b>                | 8                                  | 1    | 11   | 66   | 6    | X                                              | 92  |
| <b>Breast invasive carcinoma</b>               | 15                                 | 0    | 7    | 17   | 3    | X                                              | 42  |
| <b>Cholangiocarcinoma</b>                      | 0                                  | 0    | 1    | 0    | 0    |                                                | 1   |
| <b>Colon adenocarcinoma</b>                    | 17                                 | 2    | 19   | 16   | 10   | X                                              | 64  |
| <b>Diffuse large B-cell lymphoma</b>           | 0                                  | 0    | 1    | 1    | 0    |                                                | 2   |
| <b>Esophageal carcinoma</b>                    | 9                                  | 0    | 13   | 10   | 6    | X                                              | 38  |
| <b>Glioblastoma multiforme</b>                 | 3                                  | 0    | 4    | 4    | 1    | X                                              | 12  |
| <b>Head &amp; neck squamous cell carcinoma</b> | 6                                  | 1    | 16   | 14   | 10   | X                                              | 47  |
| <b>Kidney chromophobe</b>                      | 0                                  | 0    | 0    | 0    | 1    |                                                | 1   |
| <b>Kidney clear cell carcinoma</b>             | 0                                  | 1    | 1    | 0    | 0    |                                                | 2   |
| <b>Liver hepatocellular carcinoma</b>          | 1                                  | 2    | 3    | 2    | 0    | X                                              | 8   |
| <b>Lung adenocarcinoma</b>                     | 1                                  | 0    | 5    | 9    | 2    | X                                              | 17  |
| <b>Lung squamous cell carcinoma</b>            | 8                                  | 2    | 10   | 15   | 5    | X                                              | 40  |
| <b>Mesothelioma</b>                            | 0                                  | 0    | 0    | 2    | 0    |                                                | 2   |
| <b>Pancreatic adenocarcinoma</b>               | 4                                  | 0    | 8    | 5    | 3    | X                                              | 20  |
| <b>Prostate adenocarcinoma</b>                 | 2                                  | 0    | 5    | 1    | 2    | X                                              | 10  |
| <b>Rectum adenocarcinoma</b>                   | 7                                  | 1    | 7    | 7    | 8    | X                                              | 30  |
| <b>Sarcoma</b>                                 | 5                                  | 1    | 4    | 1    | 0    |                                                | 11  |
| <b>Stomach adenocarcinoma</b>                  | 12                                 | 0    | 7    | 17   | 6    | X                                              | 42  |
| <b>Thymoma</b>                                 | 0                                  | 0    | 1    | 1    | 0    |                                                | 2   |
| <b>Uterine carcinosarcoma</b>                  | 2                                  | 0    | 7    | 4    | 0    | X                                              | 13  |
| <b>Uterine corpus endometrioid carcinoma</b>   | 9                                  | 0    | 10   | 14   | 6    | X                                              | 39  |
| <b>Total counts</b>                            | 112                                | 12   | 160  | 214  | 71   |                                                | 569 |
