# Supplementary material for: HOPS/TMUB1 Enhances Apoptosis in TP53 Mutation-Independent Setting in Human Cancers
Source: MDPI journal article supplement (doi:10.3390/ijms25094600), 2024-04-23
Supplement: s1 [file s1]

**Figure S1**

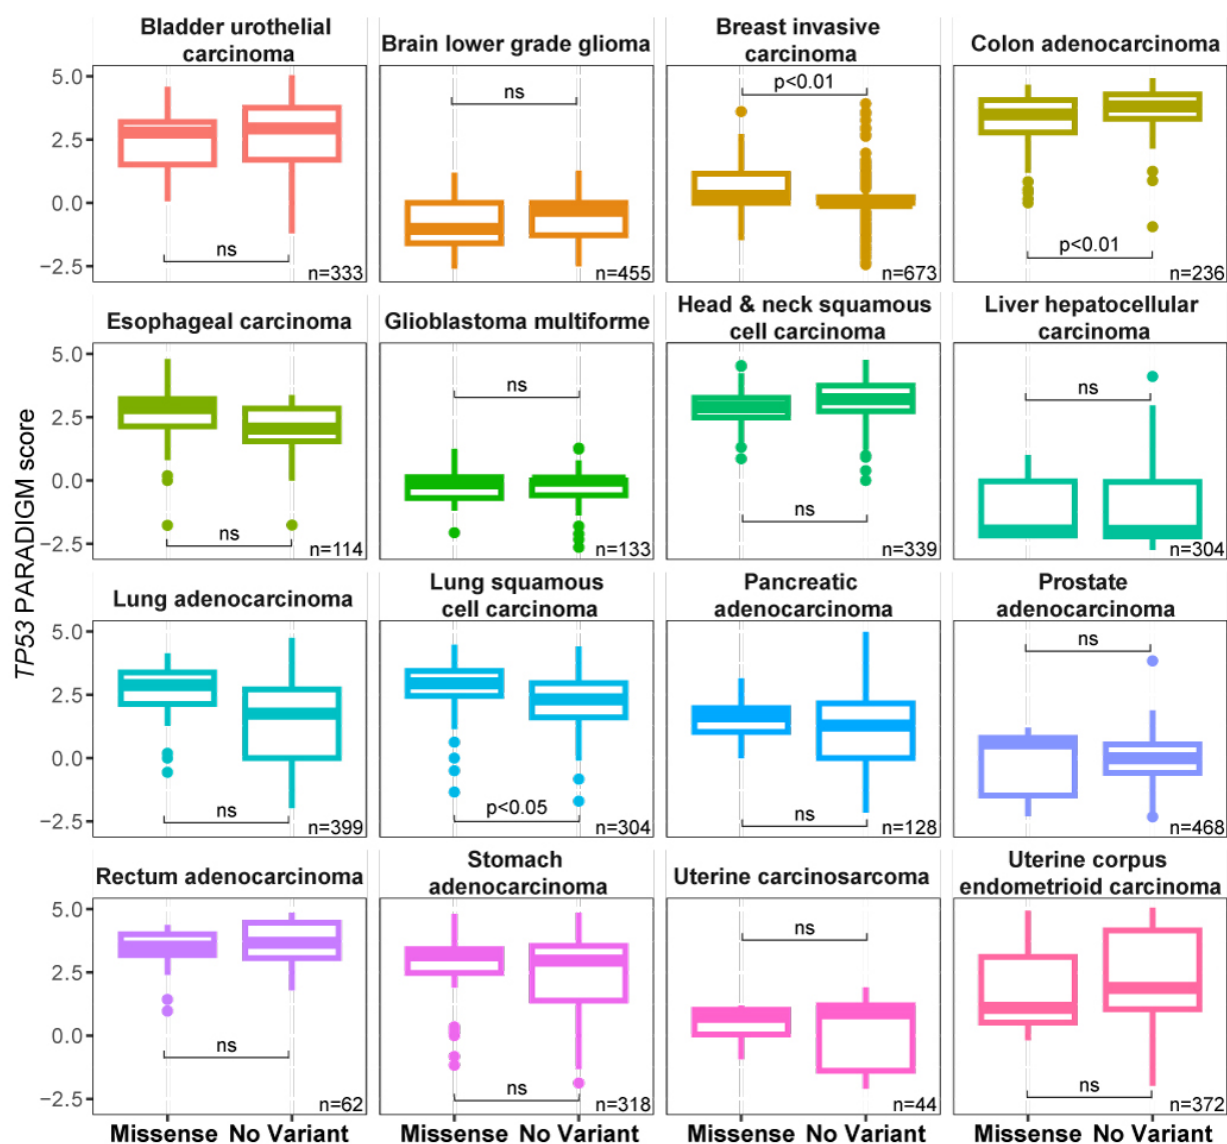

**Figure S1.** TP53 PARADIGM score in selected tumors comparing two subgroups: p53 missense mutations versus no variant.
