# Supplementary material for: HOPS/TMUB1 Enhances Apoptosis in TP53 Mutation-Independent Setting in Human Cancers
Source: MDPI journal article supplement (doi:10.3390/ijms25094600), 2024-04-23

## **FACS analysis raw data**

Samples identification:

SAMPLE 1) Control

SAMPLE 2) Dead cells (FVD)

SAMPLE 3) FVD control

SAMPLE 4) Cy7 control

SAMPLE 5) GFP control

SAMPLE 6) GFP + FVD control

SAMPLE 7) GFP + Cy7 control

SAMPLE 8) pEGFP-N1 (+GFP)

SAMPLE 9) pEGFP-N1-HOPS (+HOPS-GFP)

# SKBR3

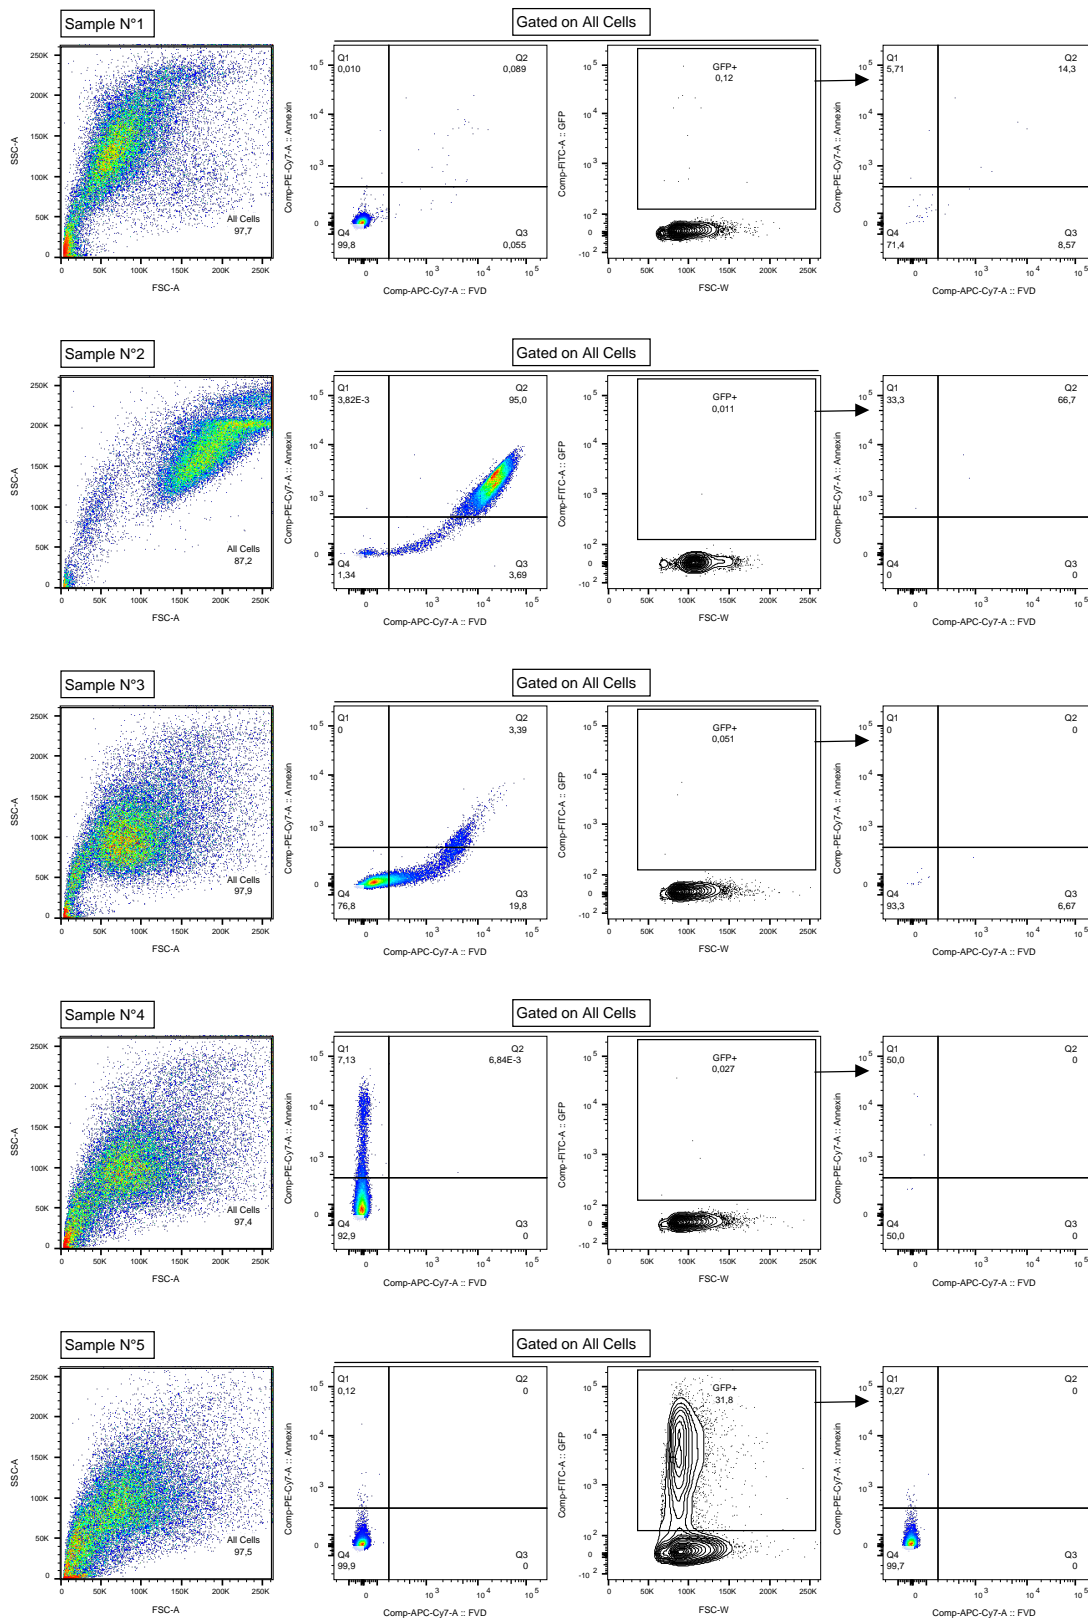

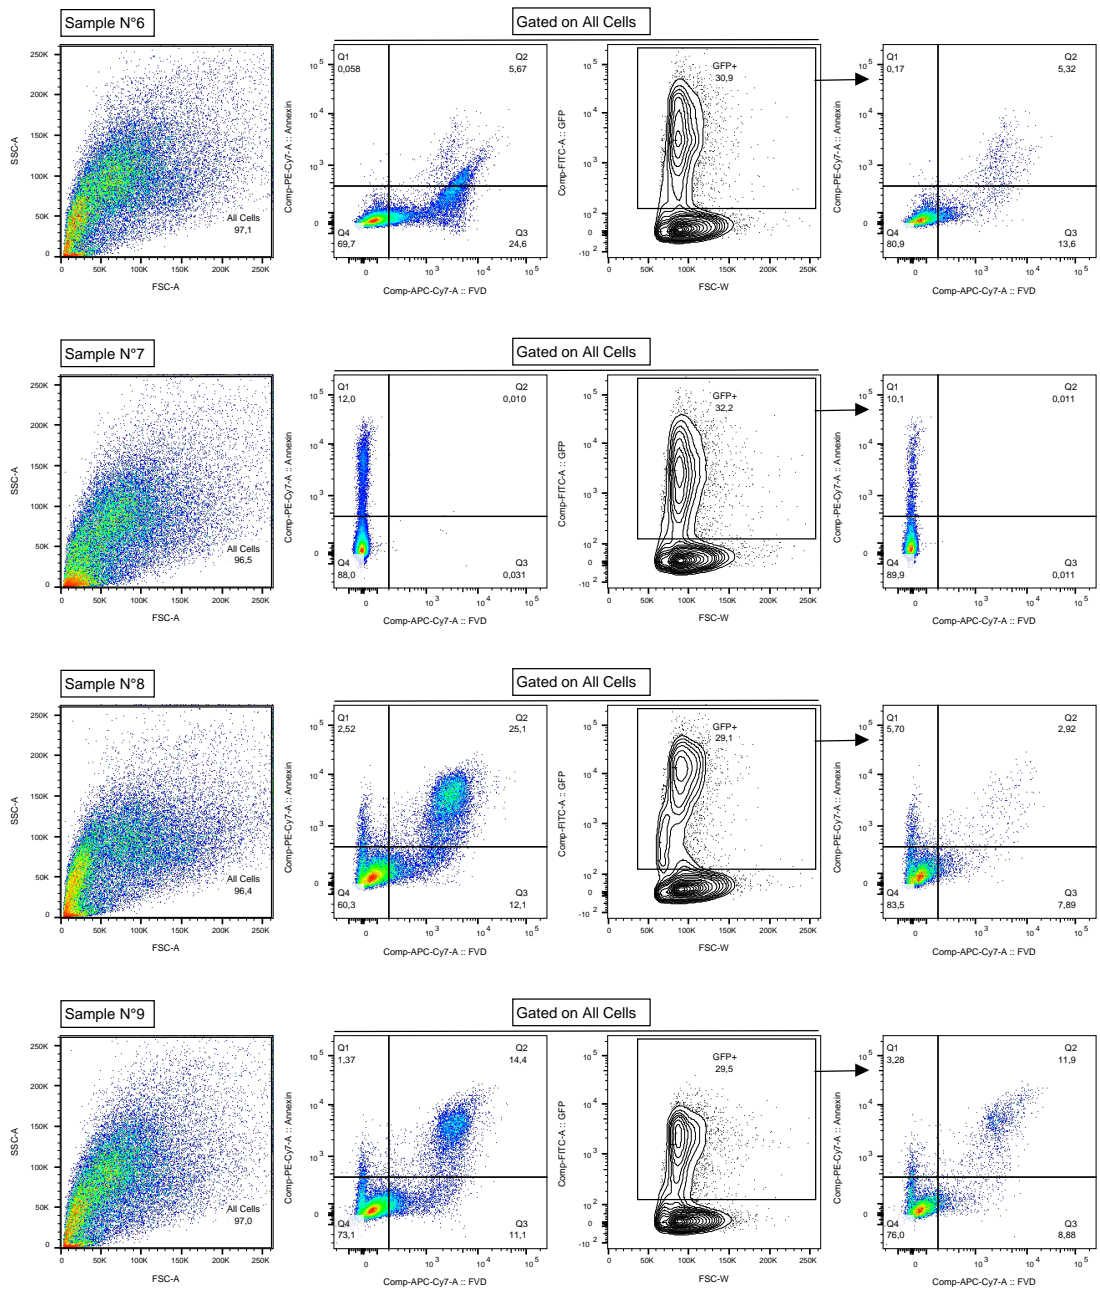

MIA PaCa 2

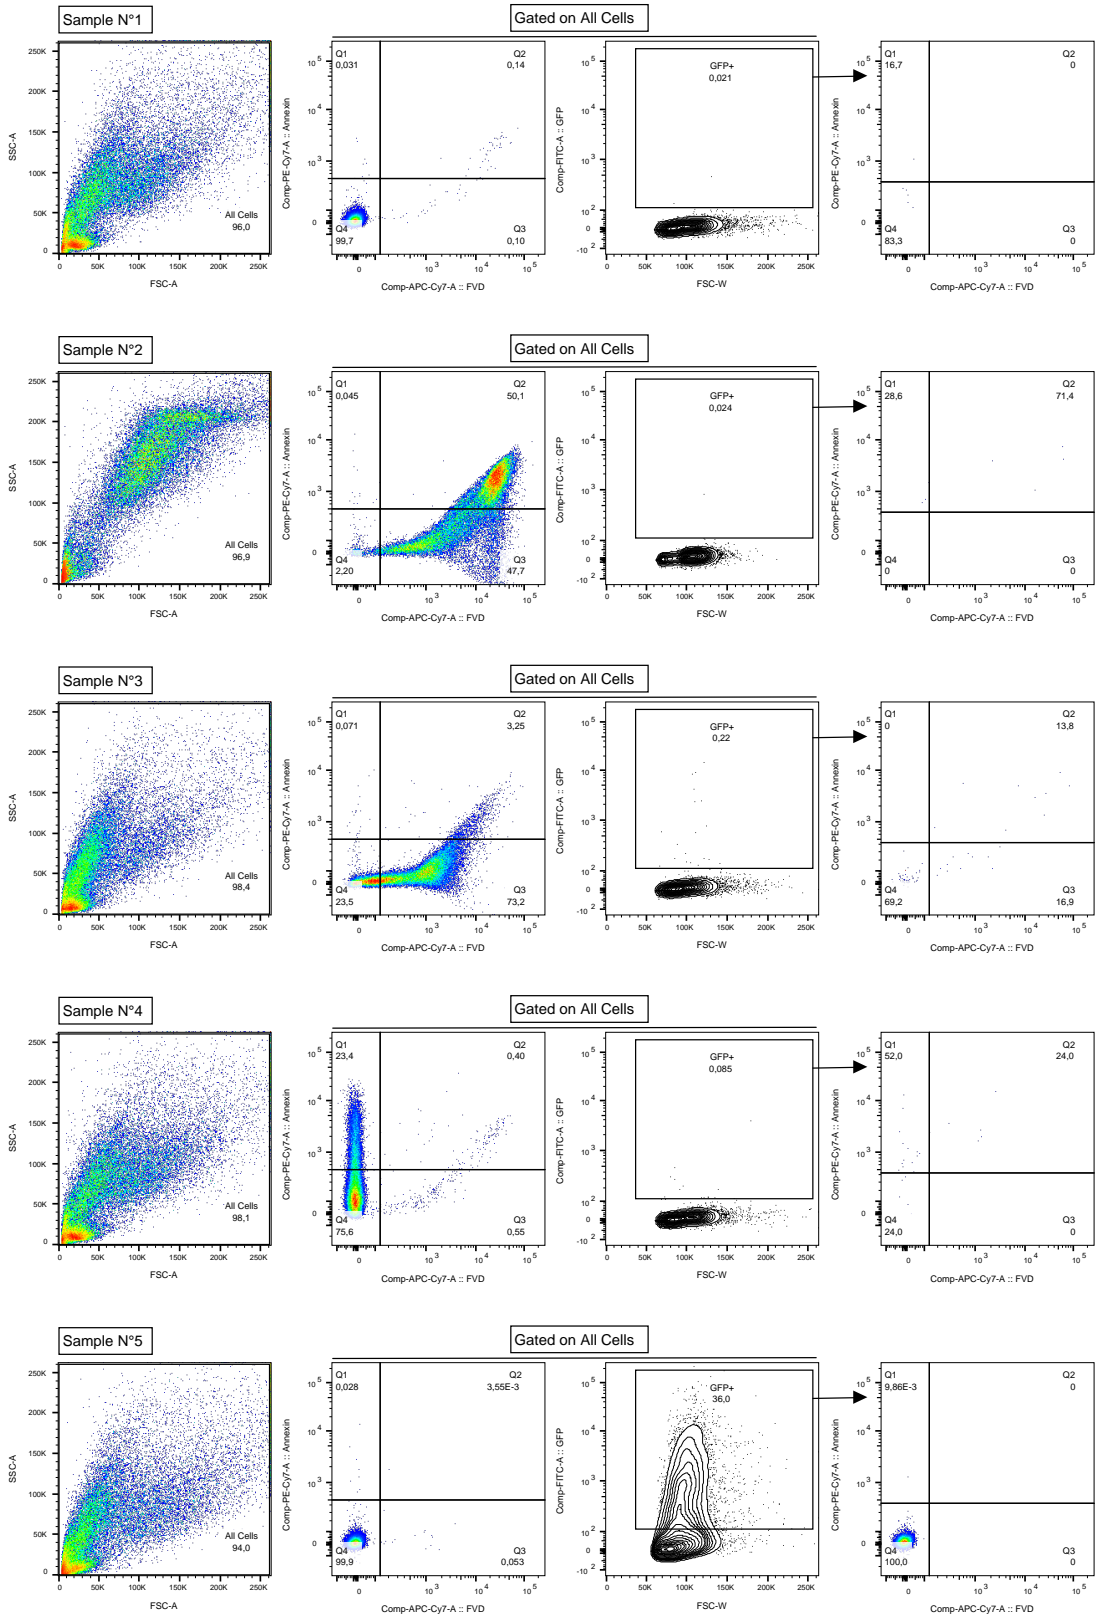

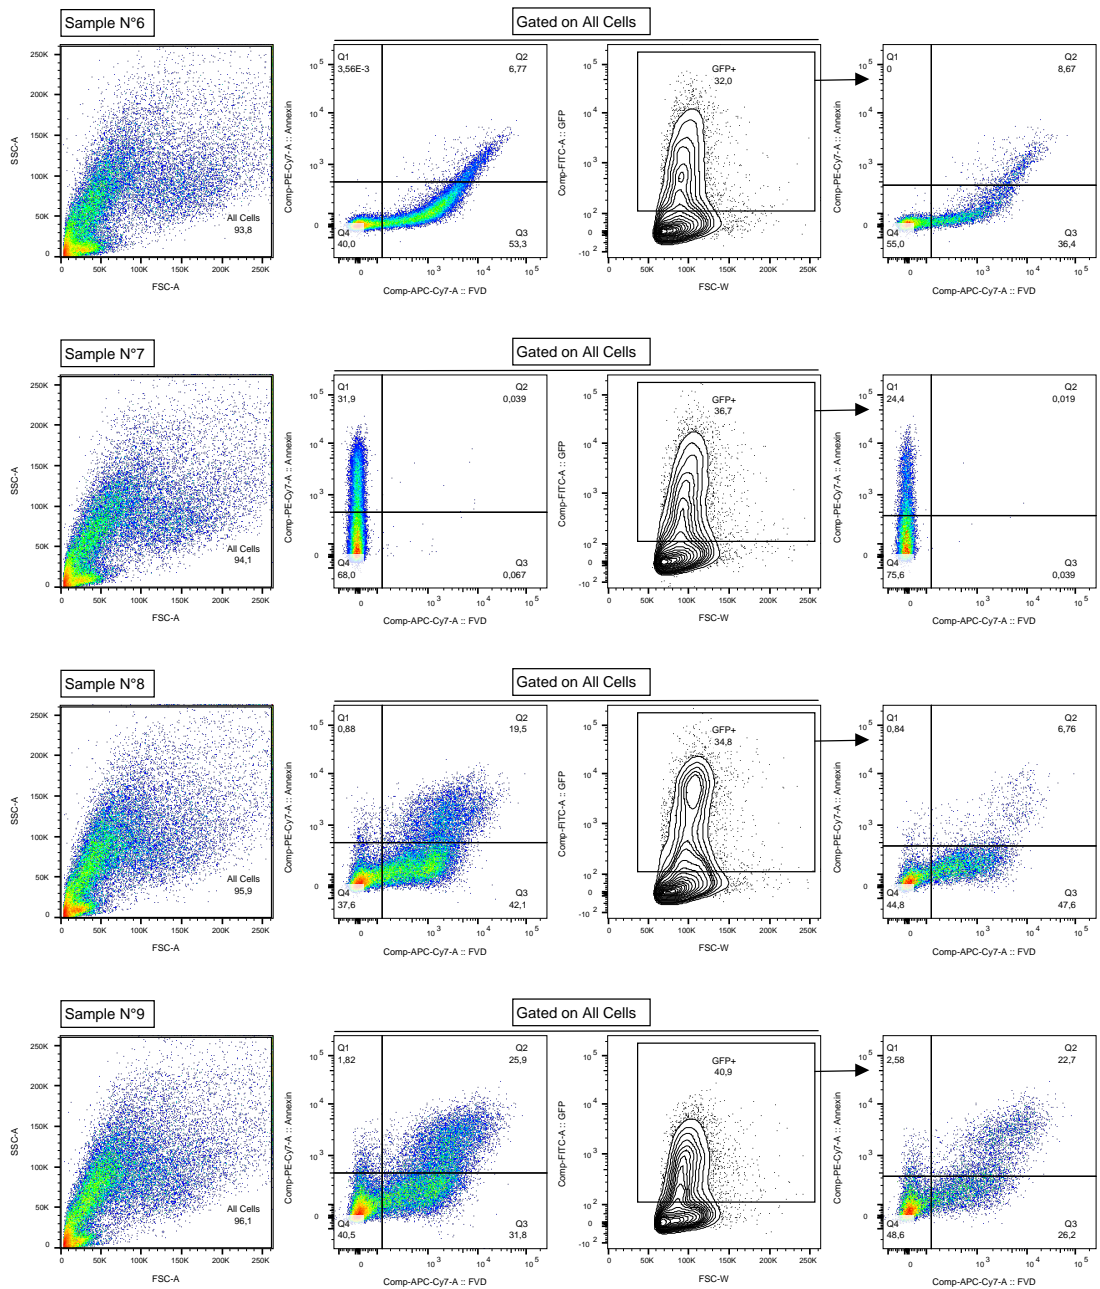

# H1975

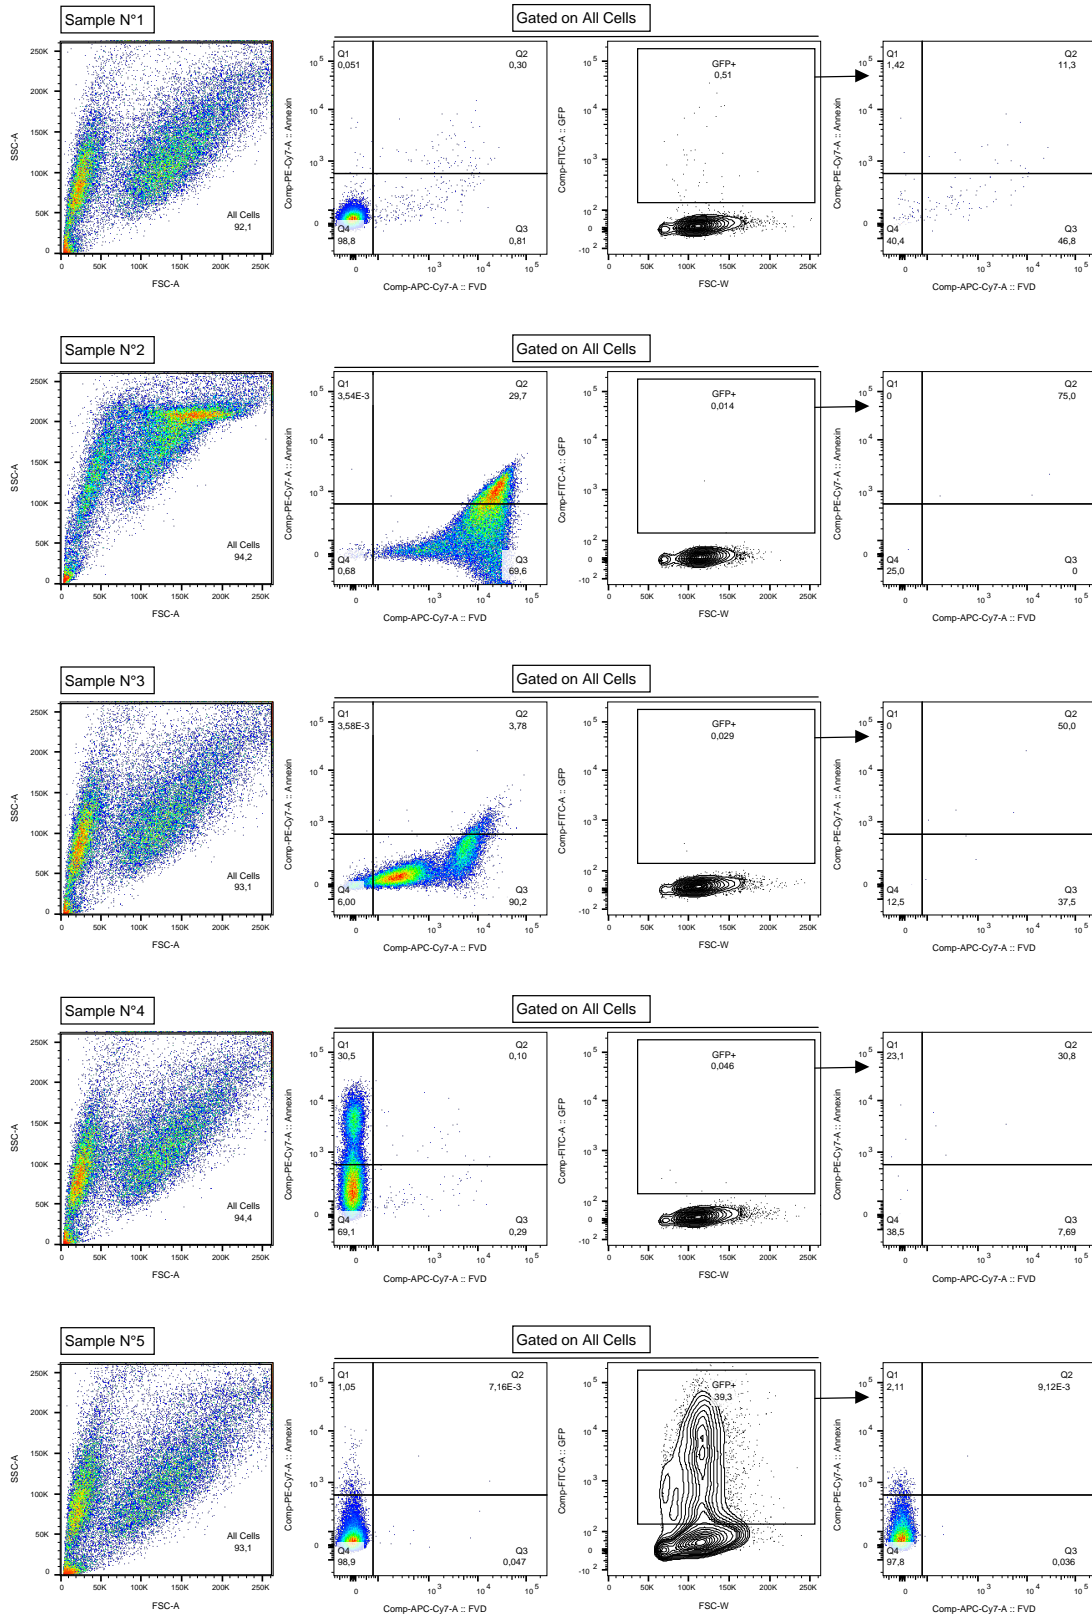



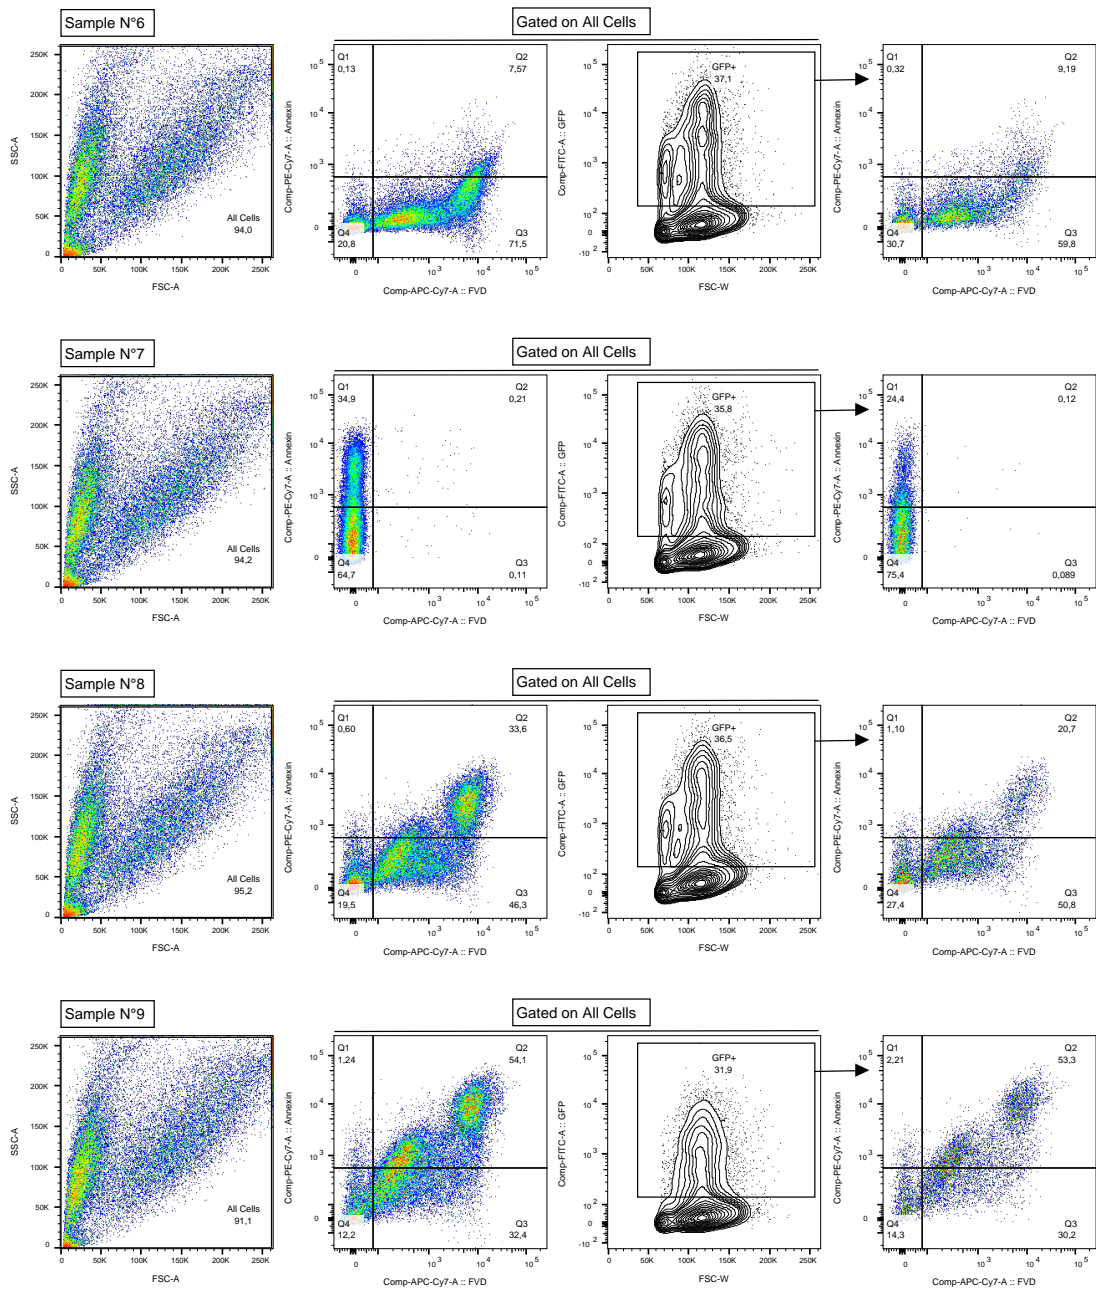

Supplement: s1 [file s1]
