# Supplementary material for: HOPS/TMUB1 Enhances Apoptosis in TP53 Mutation-Independent Setting in Human Cancers
Source: MDPI journal article supplement (doi:10.3390/ijms25094600), 2024-04-23
Supplement: s1 [file s1]

**Table S1.** Primer sequences used in the RT-qPCR assays.

| Target         | Primer name | Sequence (5'→3')        |
|----------------|-------------|-------------------------|
| <i>β-actin</i> | β-actin H F | CACTCTTCCAGCCTTCCT      |
|                | β-actin H R | CAGGTCTTTGCGGATGTC      |
| <i>Myc</i>     | Myc H F     | CACACATCAGCACAACTACG    |
|                | Myc H R     | CTGTCCAACCTTGACCCTCTT   |
| <i>Tp63</i>    | TP63 H F    | CGTGTCCTTCCAGCAGTC      |
|                | TP63 H R    | GGCAGTAGAGTTTCTTCAGTTCA |
