# Supplementary material for: HOPS/TMUB1 Enhances Apoptosis in TP53 Mutation-Independent Setting in Human Cancers
Source: MDPI journal article supplement (doi:10.3390/ijms25094600), 2024-04-23
Supplement: s1 [file s1]

**Figure S3**

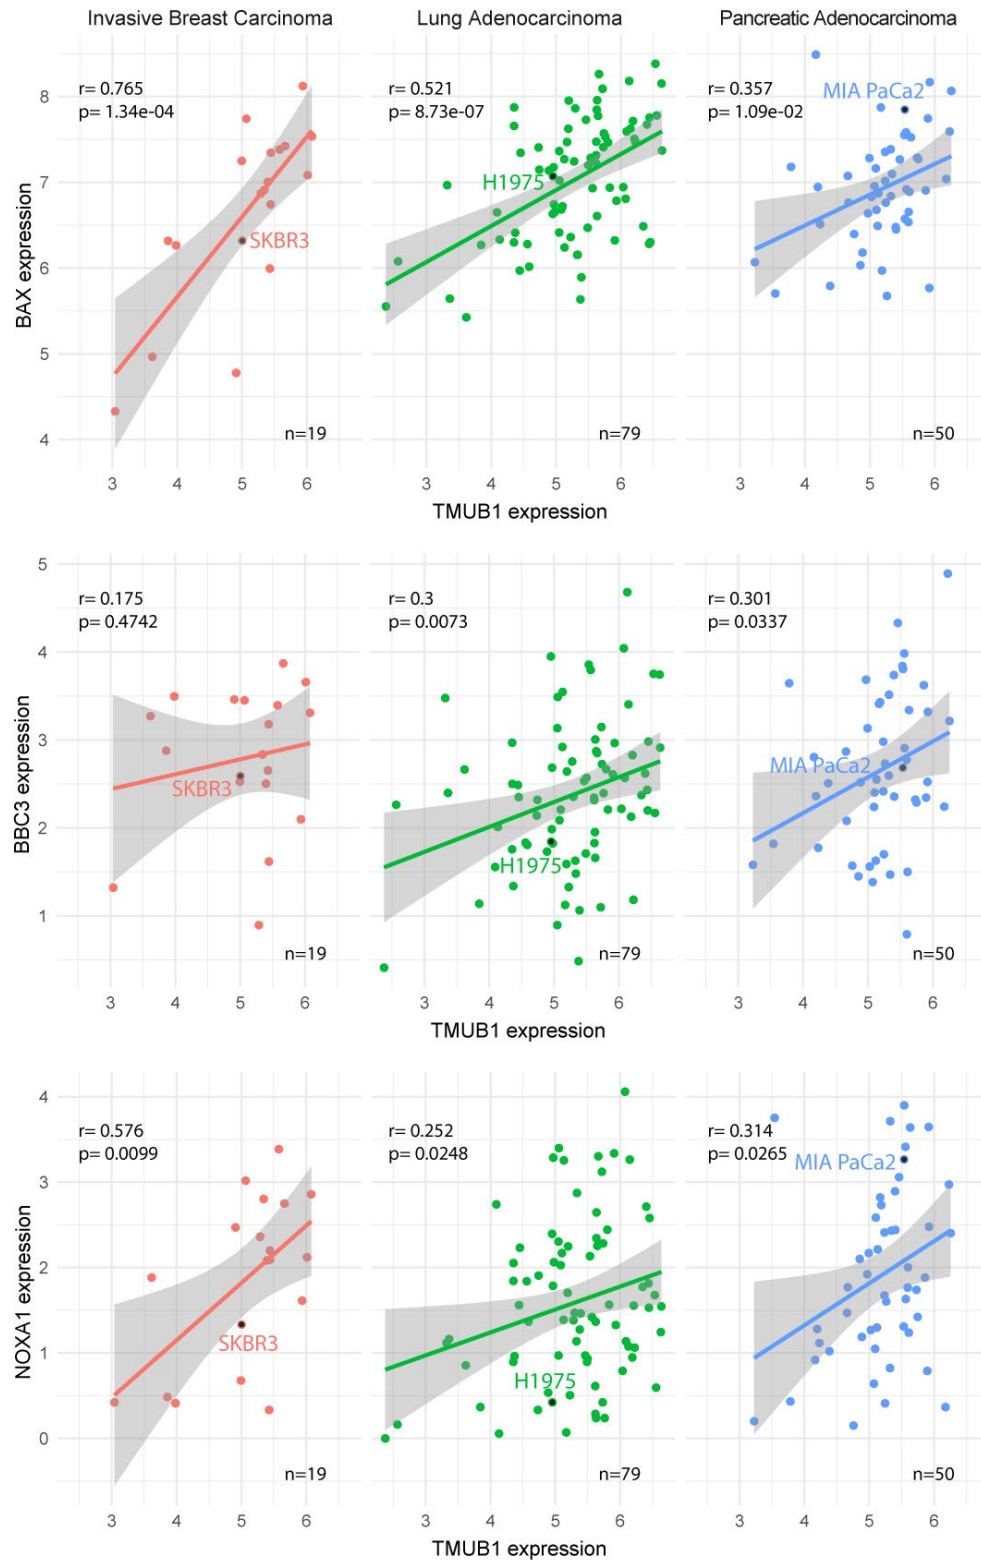

**Figure S3.** Correlation analysis in selected cell lines type (Invasive Breast Carcinoma, n=19; Lung Adenocarcinoma, n=79; Pancreatic Adenocarcinoma, n=50) between *TMUB1* expression and the apoptotic genes analysed (*BAX*, *BBC3* and *NOXA1*). Correlation score is reported in each scatter plot. Regression line is shown to estimate the linear relationship between the genes.
