# Supplementary material for: HOPS/TMUB1 Enhances Apoptosis in TP53 Mutation-Independent Setting in Human Cancers
Source: Int J Mol Sci. 2024 Apr 23;25(9):4600. doi: 10.3390/ijms25094600 (PMC11083489; doi:10.3390/ijms25094600)
Supplement: Supplementary file 1 [file ijms-25-04600-s001.zip]

Archive with 7 entries (7 files):
- FACS raw data.pdf
- Figure S1 with caption.pdf
- Figure S2 with caption.pdf
- Figure S3 with caption.pdf
- Supplementary information.pdf
- Table S1.pdf
- Table S2.pdf
